# Supplementary material for: Composition and Reactivity of Volatile Organic Compounds and the Implications for Ozone Formation in the North China Plain
Source: MDPI journal article supplement (doi:10.3390/atmos15020213), 2024-02-09
Supplement: s1 [file s1]

Supplementary Materials

# Composition and Reactivity of Volatile Organic Compounds and the Implications for Ozone Formation in the North China Plain

Saimei Hao <sup>1,2</sup>, Qiyue Du <sup>3</sup>, Xiaofeng Wei <sup>2</sup>, Huaizhong Yan <sup>4</sup>, Miao Zhang <sup>4</sup>, Youmin Sun <sup>2</sup>, Shijie Liu <sup>5</sup>, Lianhuan Fan <sup>2</sup> and Guiqin Zhang <sup>2,\*</sup>

- <sup>1</sup> Qingdao Gemini Scientific Co., Ltd., Qingdao 266100, China; 2020040209@stu.sdjzu.edu.cn
- <sup>2</sup> School of Municipal and Environmental Engineering, Shandong Jianzhu University, Jinan 250101, China; weixf@sdjzu.edu.cn (X.W.); ymsun@sdjzu.edu.cn (Y.S.); 2021040205@stu.sdjzu.edu.cn (L.F.)
- <sup>3</sup> School of Safety and Environmental Engineering, Shandong University of Science and Technology, Qingdao 266555, China; dqy-061@sdust.edu.cn
- <sup>4</sup> Shandong Provincial Ecological Environment Monitoring Center, Jinan 250101, China; yanhuaizhong@shandong.cn (H.Y.); zhangmiao@shandong.cn (M.Z.)
- <sup>5</sup> Resource and Environment Innovation Institute, Shandong Jianzhu University, Jinan 250101, China; liushijie23@sdjzu.edu.cn
- \* Correspondence: zhangguiqin@sdjzu.edu.cn; Tel.: +86-136-7541-1301

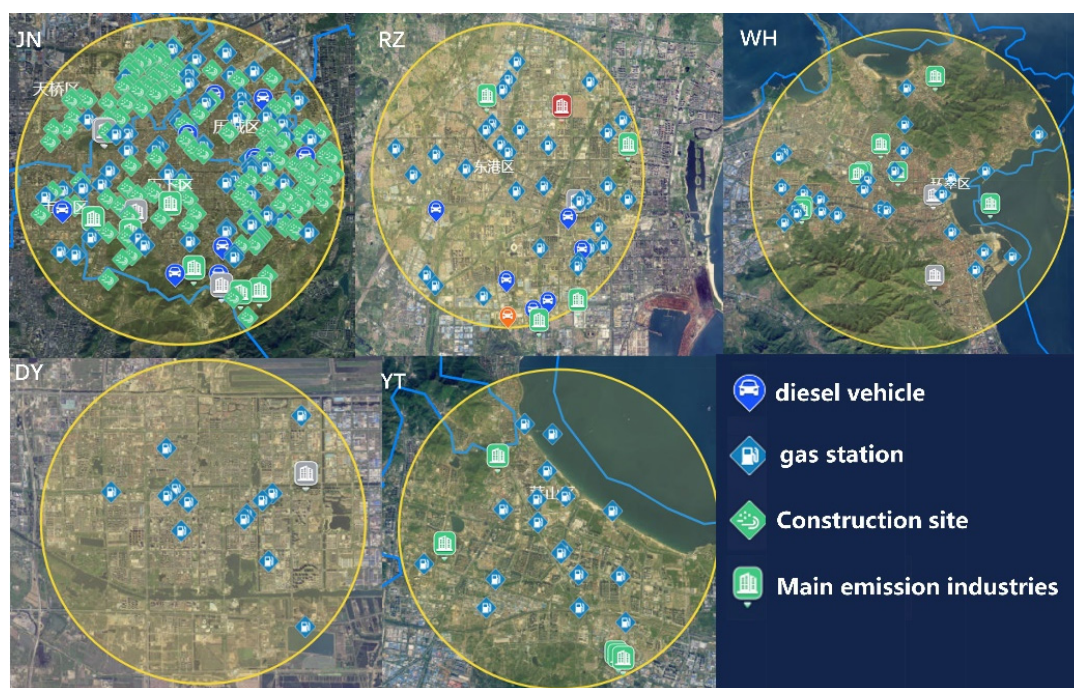

**Figure S1.** Main sources of pollution around monitoring sites (Jinan (JN), Dongying (DY), Rizhao (RZ), Yantai (YT) and Weihai (WH)).

**Table S1.** The name of the compound monitored in this study.

| Compound name |                        |
|---------------|------------------------|
| ethane        | 2-methylhexane         |
| Propane       | 2,3-dimethylpentane    |
| Isobutane     | 3-Methylhexane         |
| 1-butylene    | 2,2,4-trimethylpentane |
| Isopentane    | n-Heptane              |

---

|                                |                           |
|--------------------------------|---------------------------|
| n-Pentane                      | Methylcyclohexane         |
| 2,2-dimethyl butane            | 2,3,4-trimethylpentane    |
| Cyclopentane                   | 2-Methylheptane           |
| 2,3-Dimethylbutane             | 3-Methylheptane           |
| 2-Methylpentane                | octane                    |
| 3-methyl pentane               | n-Nonane                  |
| n-Hexane                       | n-Decane                  |
| Methylcyclopentane             | n-Undecane                |
| 2,4-dimethylpentane            | N-dodecane                |
| cyclohexane                    | ethyne                    |
| 1-Hexene                       | Benzene                   |
| Ethylene                       | methylbenzene             |
| propylene                      | ethylbenzene              |
| trans-2-butene                 | m-Xylene + p-Xylene       |
| 1-butylene                     | Styrene                   |
| cis-2-butene                   | ortho-xylene              |
| trans-2-pentene                | isopropylbenzene          |
| 1-pentene                      | n-Propylbenzene           |
| cis-2-pentene                  | m-Ethyltoluene            |
| Isoprene                       | p-Ethyltoluene            |
| Butadiene                      | Mesitylene                |
| butyraldehyde                  | o-Ethyltoluene            |
| Acrolein                       | 1,2,4-trimethylbenzene    |
| Propionaldehyde                | 1,2,3-trimethylbenzene    |
| Propanone                      | m-Diethylbenzene          |
| methyl tert-butyl ether        | 1,4-Diethylbenzene        |
| methacrylaldehyde              | Capronaldehyde            |
| Pentanal                       | 2-Butanone                |
| 1,2-Dichlorotetrafluoroethane  | 1,1,1-Trichloroethane     |
| Chloromethane                  | Carbon tetrachloride      |
| Chloroethene                   | 1,2-Dichloroethane        |
| Methyl bromide                 | Trichloroethylene         |
| Chloroethane                   | 1,2-Dichloropropane       |
| Trichlorofluoromethane         | Bromodichloromethane      |
| 1,1-Dichloroethane             | trans-1,3-Dichloropropene |
| 1,1,2-Trichlorotrifluoroethane | trans-1,3-Dichloropropene |
| Dichloromethane                | 1,1,2-Trichloroethane     |
| 1,1-Dichloroethene             | Tetrachloroethylene       |
| cis-1,2-Dichloroethylene       | 1,2-Dibromoethane         |
| Chloroform                     | Chlorobenzene             |
| 1,2-Dichlorobenzene            | Bromoform                 |
| 1,4-Dichlorobenzene            | 1,1,2,2-Tetrachloroethane |
| Benzyl chloride                | 1,3-Dichlorobenzene       |

---
